# Supplementary material for: Transfer-free and printable graphene/ZnO-nanoparticle nanohybrid photodetectors with high performance
Source: Royal Society of Chemistry journal article supplement (doi:10.1039/c7tc01032j), 2017-01-01
Supplement: c7tc01032j1.pdf [file c7tc01032j1.pdf]

## Supporting Information

### Transfer-free and printable graphene/ZnO-nanoparticle nanohybrid photodetectors with high performance

Qingfeng Liu,<sup>\*,†</sup> Maogang Gong,<sup>\*,†</sup> Brent Cook,<sup>†</sup> Dan Ewing,<sup>‡</sup> Matthew Casper,<sup>‡</sup> Alex Stramel,<sup>‡</sup> and Judy Wu<sup>\*,†</sup>

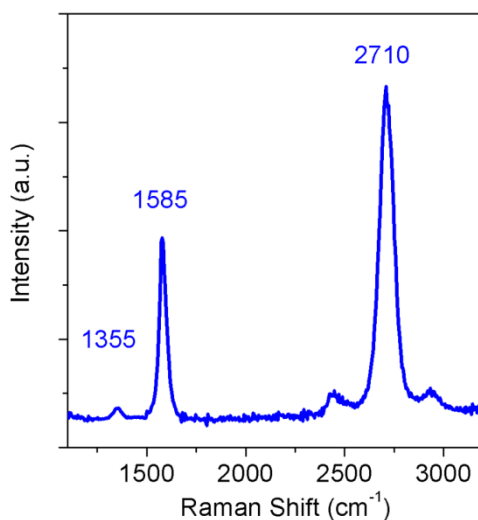

**Figure S1.** Raman spectrum of the metal-free CVD monolayer graphene without Zn(Ac)<sub>2</sub> coating after thermal anneal of 1 h at 350 °C in air.

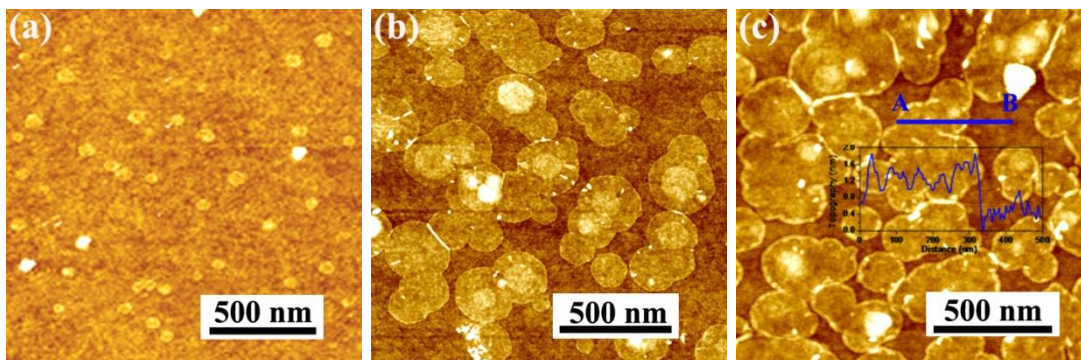

**Figure S2.** AMF images of the evolution of the graphene nuclei and grains in metal-free CVD process.

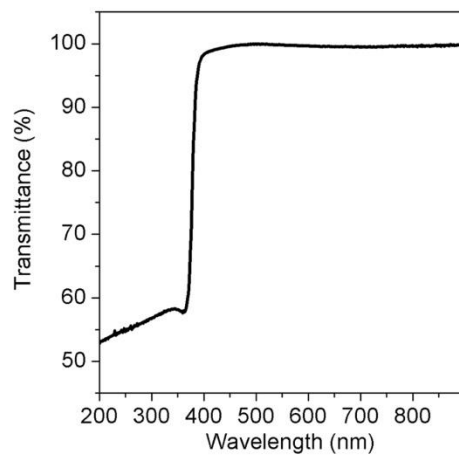

**Figure S3.** Transmittance of the graphene/ZnO-NP nanohybrids.

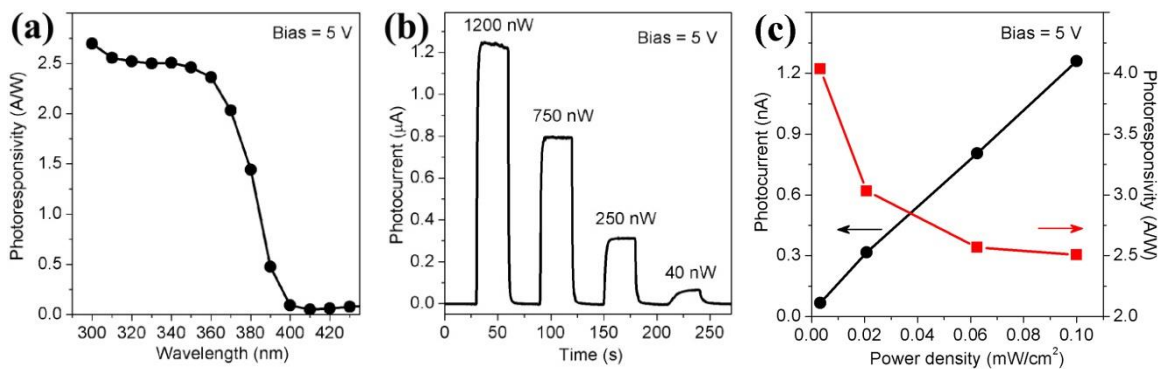

**Figure S4.** (a) Spectral photoresponsivity of a representative ZnO-NP film photodetector. (b) Dynamic photoresponse at different incident UV (340 nm) illumination powers at applied bias of 5V. (c) Photocurrent and photoresponsivity as function of the UV illumination power density.
